# Supplementary material
Source: PubMed Central journal article supplement (PMC1955368)
Supplement: hesr0042-0727-s1.pdf [file hesr0042-0727-s1.pdf]

## **Appendix: Search Strategies**

### **1. PsycINFO**

Set 1: KW=(MEDICAL INTERPRET\* or LANGUAGE INTERPRETER\* or INTERPRETER SERVICE\*)  
(kw=descriptor, title, abstr, identifiers)

Set 2: DE=(FOREIGN LANGUAGE TRANSLATION or FOREIGN LANGUAGES ) and  
DE=(HEALTH CARE DELIVERY or HOME CARE or HOSPICE or MANAGED CARE or HEALTH MAINTENANCE ORGANIZATIONS or TELEMEDICINE or HEALTH CARE SERVICES or LONG TERM CARE or MENTAL HEALTH SERVICES or COMMUNITY MENTAL HEALTH SERVICES or PALLIATIVE CARE or primary Health Care or Patients or Hospitalized Patients or Medical Patients or Outpatients or Surgical Patients or Terminally Ill Patients or Emergency Services or Health) (de=descriptor ie subject headings)

Set 3: KW=(LANGUAGE BARRIER\* or CULTURAL BARRIER\* or COMMUNICATION BARRIER\*) and  
KW=(PATIENTS OR PATIENT OR MEDICAL PATIENTS OR OUTPATIENTS OR HOSPITALIZED PATIENTS OR SURGICAL PATIENTS or TERMINALLY ILL PATIENTS OR GERIATRIC PATIENTS OR HEALTH CARE DELIVERY or HEALTH CARE SERVICES OR EMERGENCY SERVICES OR PRIMARY HEALTH CARE)

Set 4: #2 or #3

Set 5: #4 and not DE=(TESTING or TEST INTERPRETATION or PSYCHOMETRICS or PSYCHODIAGNOST\* or MEASUREMENT or QUESTIONNAIRES or INVENTORIES or TEST VALIDITY or TEST RELIABILITY OR SCORING OR TEST SCORES)

Set 6: #1 or #5

### **2. PubMed**

Field: All Fields, Limits: Publication Date from 1966 to 2005/08/31, English

#1 Search MEDICAL INTERPRETER OR MEDICAL INTERPRETERS OR INTERPRETER SERVICE OR INTERPRETER SERVICES

#2 Search (COMMUNICATION BARRIERS OR TRANSLATING) AND (ACCULTURATION OR CROSS-CULTURAL COMPARISON OR CULTURAL DIVERSITY OR CULTURE[MH] OR ETHNIC GROUPS OR ETHNOLOGY)

#3 Search TRANSLATING AND COMMUNICATION BARRIERS

#4 Search ((INTERPERSONAL RELATIONS OR PATIENT CARE OR HEALTH FACILITIES OR PATIENTS) AND LANGUAGE AND (ETHNICITY OR ETHNOLOGY OR COMMUNICATION BARRIERS OR CULTURAL DIVERSITY OR CULTURE OR ACCULTURATION OR CROSS-CULTURAL COMPARISON) AND ENGLISH[LA])

#5 Search #1 OR #2 OR #3 OR #4

### **3. Cochrane Library**

Search for 'medical interpreter' AND 'language' in all text
